# Supplementary material for: Hydrological impacts of global land cover change and human water use
Source: Copernicus journal article supplement (doi:10.5194/hess-21-5603-2017), 2017-11-14
Supplement: Supplementary file 1 [file Comparison_GRDC.xlsx]

## Sheet: LC1850
id_from_grdc	river_name	station_name	country_code	grdc_catchment_area_in_km2	grdc_latitude_in_arc_degree	grdc_longitude_in_arc_degree	model_catchment_area_in_km2	model_latitude_in_arc_degree	model_longitude_in_arc_degree	model_landmask	num_of_month_pairs	average_observation_m3_s	average_model_m3_s	bias	correlation	R2	rmse	mae	ns_efficiency	kge		average_observation_km3_yr	average_model_km3_yr	bias_km3_yr
1812500	SENEGAL	BAKEL	SN	218000	14.9	-12.45	222569	14.75	-12.25	1	88	315.091	1083.51	768.415	0.885461	0.784042	948.674	768.415	-2.21854	0.150523		9.9433	34.1921	24.2488
6435060	RHINERIVER	LOBITH	NL	160800	51.84	6.11	161975	51.75	6.25	1	216	2364.63	2488.95	124.317	0.550941	0.303536	922.078	716.257	0.161249	0.536782		74.6206	78.5437	3.92308
2651100	BRAHMAPUTRA	BAHADURABAD	BD	636130	25.18	89.67	526096	24.25	89.75	1	84	22849	17360.5	-5488.51	0.947829	0.898379	8612.97	5851.85	0.772375	0.555638		721.043	547.843	-173.201
4208025	MACKENZIERIVER	ARCTICREDRIVER	CA	1660000	67.4583	-133.745	1665430	67.25	-132.75	1	216	8731.71	5290.02	-3441.7	0.887949	0.788453	4976.95	3528.03	0.327842	-0.15046		275.546	166.937	-108.609
3649950	TOCANTINS	TUCURUI	BR	742300	-3.75778	-49.6533	748796	-4.75	-49.25	1	224	11344.1	21424.3	10080.2	0.813008	0.660982	16146.9	10475.6	-2.16014	0.275816		357.985	676.085	318.1
3206720	ORINOCO	PUENTEANGOSTURA	VE	836000	8.15	-63.6	838059	8.25	-63.75	1	132	32719.9	39307	6587.12	0.793739	0.630021	15872.7	11304.2	0.472326	0.729646		1032.54	1240.41	207.869
4103200	YUKONRIVER	PILOTSTATION_AK	US	831390	61.9337	-162.883	825250	62.75	-163.75	1	330	6583.84	1912.91	-4670.93	0.731315	0.534822	6484.26	4682.52	-0.479125	-3.07959		207.766	60.3655	-147.4
2181900	YANGTZERIVER_CHANGJIANG_	DATONG	CN	1705383	30.77	117.62	1709530	31.25	117.75	1	12	25012.3	25480.5	468.28	0.949121	0.90083	4219.62	2794.67	0.873439	0.887206		789.31	804.088	14.7775
2856900	GODAVARI	POLAVARAM	IN	299320	16.92	81.78	303518	17.75	81.25	1	12	2171.25	5963.77	3792.52	0.863664	0.745915	5569.66	3860.09	-2.02002	0.174775		68.518	188.198	119.68
4115200	COLUMBIARIVER	THEDALLES_OR	US	613830	45.6073	-121.173	617860	45.75	-121.25	1	384	4960.51	3704.85	-1255.65	0.745323	0.555506	2032.28	1653.82	-0.0693862	0.541703		156.538	116.914	-39.6245
2335950	INDUS	KOTRI	PK	832418	25.37	68.37	835154	24.75	68.25	1	12	1666.42	5127.59	3461.18	0.735374	0.540775	3757.5	3461.18	-3.06823	0.265683		52.587	161.811	109.224
1537100	CHARI	NDJAMENA_FORTLAMY_	TD	600000	12.12	15.03	604180	11.75	15.25	1	115	480.583	4324.21	3843.62	0.4402	0.193776	5811.26	3852.78	-88.9021	-0.361764		15.1657	136.459	121.293
4152050	COLORADORIVER_PACIFICOCEAN_	BELOWYUMAMAINCANALWWATYUMA_AZ	US	618715	32.7317	-114.632	628266	32.75	-114.75	1	384	79.1641	1212.02	1132.86	0.169546	0.028746	1491.37	1138.44	-153.053	-0.52767		2.49818	38.2478	35.7496
6980802	DNEPR	KAKHOVSKOYEVODOKHRANILISHCHEGES	UA	482000	46.77	33.18	486298	47.25	34.25	1	120	1422.2	2113.34	691.137	0.143704	0.0206508	1542.54	1158.22	-2.90984	0.00838324		44.8804	66.6905	21.8101
2180800	HUANGHE_YELLOWRIVER_	HUAYUANKOU	CN	730036	34.92	113.65	730401	34.75	114.75	1	120	1282.05	3118.47	1836.42	0.675606	0.456444	3165.05	1935.78	-8.64197	0.0459678		40.4576	98.4094	57.9518
1234150	NIGER	NIAMEY	NE	700000	13.52	2.08	701748	13.75	1.75	1	191	700.969	3657.05	2956.08	0.319674	0.102192	4482.4	3042.81	-53.4379	-0.341776		22.1204	115.405	93.2848
6977100	VOLGA	VOLGOGRADPOWERPLANT	RU	1360000	48.8047	44.5858	1360010	48.75	44.75	1	72	8145.28	8278.31	133.028	0.557546	0.310857	6623.54	4786.4	-1.45368	0.354561		257.04	261.238	4.19796
4351900	RIOGRANDE_US_MXBORDER_	MATAMOROS	MX	450902	25.9	-97.52	473963	26.25	-98.75	1	216	19.3491	1111.17	1091.82	0.240577	0.0578772	1609.44	1091.82	-1978.11	-0.575549		0.610597	35.0652	34.4546
6742500	DANUBERIVER	ZIMNICEA	RO	658400	43.6272	25.3544	659379	43.75	25.75	1	288	5839.17	6763.58	924.409	0.445134	0.198145	2651.25	2031.59	-0.683532	0.390729		184.266	213.438	29.1715
2917110	AMUDARYA	KERKI	TM	309000	37.83	65.25	315618	37.75	65.25	1	120	1325.76	2087.67	761.911	0.592918	0.351552	1540.6	1061.08	-1.91914	0.28762		41.8369	65.8804	24.0436
2646200	GANGES	HARDINGEBRIDGE	BD	846300	24.08	89.03	933349	24.75	88.25	1	83	11146.1	16983	5836.94	0.896356	0.803453	11244.7	6674.79	0.408171	0.546945		351.736	535.932	184.196
5204251	DARLINGRIVER	BURTUNDY	AU	647200	-33.7433	142.269	625770	-33.75	142.25	1	351	31.2841	3123.71	3092.43	0.118767	0.0141056	4057.57	3092.62	-5615.13	-0.648009		0.987231	98.5748	97.5875
2919200	URAL	KUSHUM	KZ	190000	50.85	51.28	190949	51.25	51.25	1	120	277.673	693.25	415.576	0.485242	0.23546	1071.01	555.136	-6.91611	-0.0284361		8.76251	21.8768	13.1143
2903420	LENA	KYUSYUR_KUSUR_	RU	2430000	70.7	127.65	2423610	70.25	126.75	1	264	17133.9	12099.6	-5034.24	0.831801	0.691893	15646.5	8459.05	0.453366	-0.534641		540.693	381.827	-158.865
2969101	MEKONG	KHONGCHIAM_BANDAN_	TH	419000	15.3183	105.5	421142	16.25	105.25	1	168	9276.09	7285.68	-1990.41	0.930675	0.866156	4121.08	2704.34	0.763967	0.509544		292.725	229.914	-62.8111
2906900	AMUR	KOMSOMOLSK	RU	1730000	50.63	137.12	1730150	50.25	136.75	1	226	9831.87	10041	209.099	0.734353	0.539274	6109.85	4082.68	0.412215	0.721078		310.263	316.862	6.59851
1357100	OKAVANGO_CUBANGO	MOHEMBO_MTAEMBO__________	BW	410000	-18.2833	21.8	251789	-19.25	22.75	1	254	247.762	340.276	92.5146	0.632218	0.3997	400.057	217.044	-7.85538	0.157328		7.8186	10.7381	2.91948
4213712	NELSONRIVER	KETTLEGENERATINGSTATION	CA	1060000	56.3803	-94.6339	1058040	56.75	-93.75	1	288	3320.07	5480.74	2160.67	0.302917	0.0917585	4000.68	3200.5	-16.5706	-0.0834219		104.771	172.955	68.1842
4127800	MISSISSIPPIRIVER	VICKSBURG_MS	US	2964255	32.315	-90.9058	2964670	31.75	-91.25	1	54	18939.7	28783.4	9843.74	0.623342	0.388555	14068.8	11603.9	-0.949432	0.455043		597.678	908.316	310.638
2854300	KRISHNA	VIJAYAWADA	IN	251355	16.52	80.62	255506	16.75	80.25	1	12	833.333	3186.38	2353.04	0.689198	0.474994	3445.97	2361.23	-7.99277	-0.0237314		26.2974	100.552	74.2548
1891500	ZAMBEZI	MATUNDO_CAIS__________	MZ	940000	-16.15	33.5917	1076200	-15.75	32.75	1	136	2188.39	5498.98	3310.58	0.402932	0.162354	5864.77	4118.23	-23.5276	-0.146743		69.059	173.531	104.472
1159100	ORANGE	VIOOLSDRIF__________	ZA	866486	-28.7578	17.7214	870174	-28.75	17.75	1	384	167.685	1037.23	869.548	0.398644	0.158917	1252.01	872.413	-12.3993	-0.220069		5.29162	32.7319	27.4403
5404270	MURRAY	OVERLANDCORNER______KM_	AU	1000001	-34.1708	140.275	1001840	-34.25	140.75	1	306	163.741	5026.99	4863.25	0.11751	0.0138085	6079.27	4864.02	-847.13	-0.613715		5.16716	158.636	153.469
1531700	VOLTA	SENCHI_HALCROW_	GH	394100	6.2	0.1	401991	6.25	0.25	1	72	833.125	2426.34	1593.21	0.120703	0.0145693	2594.19	1630.59	-67.7144	-0.386991		26.2909	76.5678	50.2769
3618000	AMAZONAS	JATUARANA	BR	2854286	-3.0633	-59.6478	2946190	-3.25	-59.75	1	375	125168	127833	2665.01	0.591036	0.349324	38259.2	31118.8	-0.339717	0.495672		3949.92	4034.02	84.0996
2911097	IRTYSH	TOBOLSK	RU	969000	58.2	68.23	1009560	58.25	68.25	1	226	2144.2	3116.18	971.983	0.580082	0.336495	2410.83	1549.3	-0.974578	0.36208		67.6642	98.337	30.6728
2916200	SYRDARYA	TYUMEN_ARYK	KZ	219000	44.05	67.05	215892	43.75	67.25	1	96	231.533	1102.04	870.512	0.680562	0.463164	1228.13	870.512	-43.6492	-0.177431		7.30646	34.7771	27.4707
1147010	CONGO	KINSHASA	CD	3475000	-4.3	15.3	3614930	-3.25	16.25	1	384	38798.3	65270.3	26472	0.452621	0.204866	30743.9	26599.4	-9.6803	0.177466		1224.36	2059.73	835.375
1896501	LIMPOPO	SICACATE__________	MZ	416522	-24.7444	33.5431	418117	-24.75	33.25	1	84	106.462	818.772	712.31	0.726183	0.527342	1041.09	712.31	-22.2837	-0.187591		3.35962	25.8379	22.4783
2912600	OB	SALEKHARD	RU	2949998	66.57	66.53	2471340	66.75	67.75	1	372	13054.6	12358.5	-696.135	0.64135	0.41133	8725.65	5391.92	0.329336	0.626725		411.964	389.996	-21.9679
3651805	SAOFRANCISCO	MANGA	BR	202000	-14.7572	-43.9322	203432	-15.75	-44.25	1	375	2098.2	3905.2	1807	0.798672	0.637877	3412.93	1854.35	-3.69835	0.211627		66.2127	123.236	57.0233
2909150	YENISEY	IGARKA	RU	2440000	67.48	86.5	2440630	66.25	87.25	1	252	18815.8	12556.9	-6258.87	0.678853	0.460842	16666.2	7991.46	0.290993	-0.531668		593.767	396.257	-197.511
4213551	SASKATCHEWANRIVER	GRANDRAPIDS	CA	364000	53.1639	-99.3489	359908	53.25	-100.25	1	360	534.252	1464.57	930.32	-0.110967	0.0123137	1768.84	1265.82	-35.5284	-0.507771		16.8594	46.2174	29.358
2998510	KOLYMA	KOLYMSKAYA	RU	526000	68.73	158.72	540757	68.75	158.75	1	324	3257.27	2671.7	-585.576	0.887183	0.787094	3044.71	1892.94	0.541738	-0.464303		102.79	84.3106	-18.479
																								2470.94
																						13147	15618	2470.94

## Sheet: LC2000
id_from_grdc	river_name	station_name	country_code	grdc_catchment_area_in_km2	grdc_latitude_in_arc_degree	grdc_longitude_in_arc_degree	model_catchment_area_in_km2	model_latitude_in_arc_degree	model_longitude_in_arc_degree	model_landmask	num_of_month_pairs	average_observation_m3_s	average_model_m3_s	bias	correlation	R2	rmse	mae	ns_efficiency	kge		average_observation_km3_yr	average_model_km3_yr	bias_km3_yr
1812500	SENEGAL	BAKEL	SN	218000	14.9	-12.45	222569	14.75	-12.25	1	88	315.091	1191.3	876.208	0.890845	0.793606	1065.49	876.208	-3.06	0.111997		9.9433	37.5937	27.6504
6435060	RHINERIVER	LOBITH	NL	160800	51.84	6.11	161975	51.75	6.25	1	216	2364.63	2458.34	93.7053	0.542614	0.29443	921.927	715.969	0.161524	0.526302		74.6206	77.5777	2.95705
2651100	BRAHMAPUTRA	BAHADURABAD	BD	636130	25.18	89.67	526096	24.25	89.75	1	84	22849	17334.8	-5514.19	0.948583	0.89981	8735.77	5912.76	0.765838	0.532398		721.043	547.033	-174.011
4208025	MACKENZIERIVER	ARCTICREDRIVER	CA	1660000	67.4583	-133.745	1665430	67.25	-132.75	1	216	8731.71	5365.25	-3366.46	0.887975	0.788499	4923.59	3463.7	0.342177	-0.135821		275.546	169.311	-106.235
3649950	TOCANTINS	TUCURUI	BR	742300	-3.75778	-49.6533	748796	-4.75	-49.25	1	224	11344.1	20601.9	9257.76	0.813408	0.661632	15159	9719.73	-1.78529	0.302321		357.985	650.132	292.146
3206720	ORINOCO	PUENTEANGOSTURA	VE	836000	8.15	-63.6	838059	8.25	-63.75	1	132	32719.9	39838.4	7118.48	0.794265	0.630857	16147.9	11484.6	0.453871	0.721604		1032.54	1257.18	224.637
4103200	YUKONRIVER	PILOTSTATION_AK	US	831390	61.9337	-162.883	825250	62.75	-163.75	1	330	6583.84	1912.61	-4671.23	0.731121	0.534538	6484.72	4682.86	-0.479338	-3.08025		207.766	60.3559	-147.41
2181900	YANGTZERIVER_CHANGJIANG_	DATONG	CN	1705383	30.77	117.62	1709530	31.25	117.75	1	12	25012.3	26424.4	1412.12	0.951831	0.905982	4321.75	3251.3	0.867238	0.878471		789.31	833.872	44.5622
2856900	GODAVARI	POLAVARAM	IN	299320	16.92	81.78	303518	17.75	81.25	1	12	2171.25	6121.69	3950.44	0.863263	0.745223	5704.49	3992.22	-2.16801	0.16574		68.518	193.182	124.664
4115200	COLUMBIARIVER	THEDALLES_OR	US	613830	45.6073	-121.173	617860	45.75	-121.25	1	384	4960.51	3723.78	-1236.73	0.746104	0.556672	2018.22	1641	-0.0546429	0.547331		156.538	117.511	-39.0272
2335950	INDUS	KOTRI	PK	832418	25.37	68.37	835154	24.75	68.25	1	12	1666.42	5002.48	3336.06	0.732973	0.53725	3633.36	3336.06	-2.80385	0.275976		52.587	157.863	105.276
1537100	CHARI	NDJAMENA_FORTLAMY_	TD	600000	12.12	15.03	604180	11.75	15.25	1	115	480.583	4568.5	4087.92	0.439034	0.192751	6024.7	4093.63	-95.6274	-0.367343		15.1657	144.168	129.002
4152050	COLORADORIVER_PACIFICOCEAN_	BELOWYUMAMAINCANALWWATYUMA_AZ	US	618715	32.7317	-114.632	628266	32.75	-114.75	1	384	79.1641	1169.48	1090.31	0.170888	0.0292028	1451.28	1096.33	-144.881	-0.524614		2.49818	36.9052	34.407
6980802	DNEPR	KAKHOVSKOYEVODOKHRANILISHCHEGES	UA	482000	46.77	33.18	486298	47.25	34.25	1	120	1422.2	2738.93	1316.73	0.251468	0.0632359	1959.24	1503.53	-5.30759	0.00015091		44.8804	86.4324	41.552
2180800	HUANGHE_YELLOWRIVER_	HUAYUANKOU	CN	730036	34.92	113.65	730401	34.75	114.75	1	120	1282.05	3110.27	1828.22	0.679239	0.461366	3118.65	1911.88	-8.36132	0.0514731		40.4576	98.1505	57.6929
1234150	NIGER	NIAMEY	NE	700000	13.52	2.08	701748	13.75	1.75	1	191	700.969	3638.12	2937.15	0.322915	0.104274	4458.65	3021.84	-52.8624	-0.339134		22.1204	114.808	92.6875
6977100	VOLGA	VOLGOGRADPOWERPLANT	RU	1360000	48.8047	44.5858	1360010	48.75	44.75	1	72	8145.28	8344.79	199.514	0.560198	0.313822	6601.75	4783.8	-1.43757	0.356703		257.04	263.336	6.29606
4351900	RIOGRANDE_US_MXBORDER_	MATAMOROS	MX	450902	25.9	-97.52	473963	26.25	-98.75	1	216	19.3491	1206.04	1186.69	0.232837	0.0542132	1705.12	1186.69	-2220.42	-0.580777		0.610597	38.059	37.4484
6742500	DANUBERIVER	ZIMNICEA	RO	658400	43.6272	25.3544	659379	43.75	25.75	1	288	5839.17	7266.16	1426.99	0.469138	0.22009	2871.51	2156.26	-0.97488	0.386472		184.266	229.298	45.0314
2917110	AMUDARYA	KERKI	TM	309000	37.83	65.25	315618	37.75	65.25	1	120	1325.76	2143.73	817.975	0.588422	0.346241	1561.89	1083.96	-2.00036	0.27976		41.8369	67.6496	25.8128
2646200	GANGES	HARDINGEBRIDGE	BD	846300	24.08	89.03	933349	24.75	88.25	1	83	11146.1	17619.6	6473.52	0.89799	0.806385	11726.1	7112.52	0.356411	0.522978		351.736	556.02	204.284
5204251	DARLINGRIVER	BURTUNDY	AU	647200	-33.7433	142.269	625770	-33.75	142.25	1	351	31.2841	3196.02	3164.74	0.122385	0.014978	4123.63	3164.74	-5799.47	-0.646292		0.987231	100.857	99.8694
2919200	URAL	KUSHUM	KZ	190000	50.85	51.28	190949	51.25	51.25	1	120	277.673	691.504	413.831	0.47893	0.229374	1046.09	552.59	-6.55201	-0.0248211		8.76251	21.8217	13.0592
2903420	LENA	KYUSYUR_KUSUR_	RU	2430000	70.7	127.65	2423610	70.25	126.75	1	264	17133.9	12111.2	-5022.66	0.831656	0.691651	15648.8	8467.27	0.4532	-0.536401		540.693	382.193	-158.5
2969101	MEKONG	KHONGCHIAM_BANDAN_	TH	419000	15.3183	105.5	421142	16.25	105.25	1	168	9276.09	7424.66	-1851.43	0.929337	0.863668	4083.69	2656.86	0.768231	0.517446		292.725	234.299	-58.4254
2906900	AMUR	KOMSOMOLSK	RU	1730000	50.63	137.12	1730150	50.25	136.75	1	226	9831.87	10361	529.136	0.737777	0.544315	6122.86	4150.23	0.409708	0.718175		310.263	326.961	16.6979
1357100	OKAVANGO_CUBANGO	MOHEMBO_MTAEMBO__________	BW	410000	-18.2833	21.8	251789	-19.25	22.75	1	254	247.762	421.83	174.068	0.622885	0.387986	502.657	270.202	-12.98	0.0624958		7.8186	13.3116	5.49305
4213712	NELSONRIVER	KETTLEGENERATINGSTATION	CA	1060000	56.3803	-94.6339	1058040	56.75	-93.75	1	288	3320.07	5854.09	2534.02	0.312332	0.097551	4243.61	3353.65	-18.7692	-0.0945483		104.771	184.737	79.9659
4127800	MISSISSIPPIRIVER	VICKSBURG_MS	US	2964255	32.315	-90.9058	2964670	31.75	-91.25	1	54	18939.7	29101.4	10161.8	0.637449	0.406341	14254.5	11784.8	-1.00122	0.455415		597.678	918.352	320.674
2854300	KRISHNA	VIJAYAWADA	IN	251355	16.52	80.62	255506	16.75	80.25	1	12	833.333	3279.67	2446.34	0.691744	0.478509	3509.99	2446.34	-8.33004	-0.0285856		26.2974	103.496	77.1988
1891500	ZAMBEZI	MATUNDO_CAIS__________	MZ	940000	-16.15	33.5917	1076200	-15.75	32.75	1	136	2188.39	6168.23	3979.83	0.423313	0.179194	6687.63	4619.49	-30.8931	-0.1749		69.059	194.65	125.591
1159100	ORANGE	VIOOLSDRIF__________	ZA	866486	-28.7578	17.7214	870174	-28.75	17.75	1	384	167.685	1027.31	859.628	0.411157	0.16905	1271.32	864.631	-12.8159	-0.220818		5.29162	32.4188	27.1272
5404270	MURRAY	OVERLANDCORNER______KM_	AU	1000001	-34.1708	140.275	1001840	-34.25	140.75	1	306	163.741	5294.77	5131.03	0.142631	0.0203437	6320.25	5131.03	-915.7	-0.601544		5.16716	167.087	161.92
1531700	VOLTA	SENCHI_HALCROW_	GH	394100	6.2	0.1	401991	6.25	0.25	1	72	833.125	2711.34	1878.21	0.12501	0.0156275	2859.01	1884.42	-82.4594	-0.406444		26.2909	85.5615	59.2706
3618000	AMAZONAS	JATUARANA	BR	2854286	-3.0633	-59.6478	2946190	-3.25	-59.75	1	375	125168	127896	2727.86	0.594864	0.353863	38012.8	30897.7	-0.32251	0.49994		3949.92	4036	86.083
2911097	IRTYSH	TOBOLSK	RU	969000	58.2	68.23	1009560	58.25	68.25	1	226	2144.2	3364.56	1220.36	0.580766	0.337289	2494.04	1615.52	-1.11324	0.341205		67.6642	106.175	38.5109
2916200	SYRDARYA	TYUMEN_ARYK	KZ	219000	44.05	67.05	215892	43.75	67.25	1	96	231.533	1162.8	931.269	0.683723	0.467478	1266.47	931.269	-46.4804	-0.182991		7.30646	36.6945	29.388
1147010	CONGO	KINSHASA	CD	3475000	-4.3	15.3	3614930	-3.25	16.25	1	384	38798.3	65298	26499.7	0.452379	0.204647	30691.5	26625.7	-9.64396	0.180346		1224.36	2060.61	836.25
1896501	LIMPOPO	SICACATE__________	MZ	416522	-24.7444	33.5431	418117	-24.75	33.25	1	84	106.462	933.003	826.541	0.751698	0.56505	1192.76	826.541	-29.5622	-0.21035		3.35962	29.4427	26.0831
2912600	OB	SALEKHARD	RU	2949998	66.57	66.53	2471340	66.75	67.75	1	372	13054.6	12769.5	-285.107	0.64401	0.414749	8625.11	5294.37	0.344701	0.628973		411.964	402.967	-8.99711
3651805	SAOFRANCISCO	MANGA	BR	202000	-14.7572	-43.9322	203432	-15.75	-44.25	1	375	2098.2	3678.61	1580.41	0.786654	0.618824	3193.8	1658.14	-3.11441	0.239791		66.2127	116.086	49.873
2909150	YENISEY	IGARKA	RU	2440000	67.48	86.5	2440630	66.25	87.25	1	252	18815.8	12733.2	-6082.59	0.678033	0.459729	16621.8	7888.01	0.294759	-0.536565		593.767	401.82	-191.948
4213551	SASKATCHEWANRIVER	GRANDRAPIDS	CA	364000	53.1639	-99.3489	359908	53.25	-100.25	1	360	534.252	1649.61	1115.36	-0.0999482	0.00998965	1906.04	1355.68	-41.4145	-0.520692		16.8594	52.0566	35.1972
2998510	KOLYMA	KOLYMSKAYA	RU	526000	68.73	158.72	540757	68.75	158.75	1	324	3257.27	2671.64	-585.633	0.887231	0.787179	3044.54	1892.8	0.541789	-0.46421		102.79	84.3088	-18.4808
																								2681.33
																						13147	15828.3	2681.33

## Sheet: HUM2000
id_from_grdc	river_name	station_name	country_code	grdc_catchment_area_in_km2	grdc_latitude_in_arc_degree	grdc_longitude_in_arc_degree	model_catchment_area_in_km2	model_latitude_in_arc_degree	model_longitude_in_arc_degree	model_landmask	num_of_month_pairs	average_observation_m3_s	average_model_m3_s	bias_m3_s	correlation	R2	rmse	mae	ns_efficiency	kge		average_observation_km3_yr	average_model_km3_yr	bias_km3_yr
1812500	SENEGAL	BAKEL	SN	218000	14.9	-12.45	222569	14.75	-12.25	1	88	315.091	1169.29	854.199	0.907112	0.822852	987.045	854.199	-2.48417	0.149221		9.9433	36.8992	26.9559
6435060	RHINERIVER	LOBITH	NL	160800	51.84	6.11	161975	51.75	6.25	1	216	2364.63	2252.19	-112.449	0.522484	0.272989	929.877	705.302	0.147002	0.492772		74.6206	71.0721	-3.54856
2651100	BRAHMAPUTRA	BAHADURABAD	BD	636130	25.18	89.67	526096	24.25	89.75	1	84	22849	17160.9	-5688.12	0.950872	0.904157	8758.25	5981.78	0.764631	0.527675		721.043	541.544	-179.5
4208025	MACKENZIERIVER	ARCTICREDRIVER	CA	1660000	67.4583	-133.745	1665430	67.25	-132.75	1	216	8731.71	5309.37	-3422.35	0.868084	0.75357	5155.32	3557.65	0.278799	-0.298083		275.546	167.547	-107.999
3649950	TOCANTINS	TUCURUI	BR	742300	-3.75778	-49.6533	748796	-4.75	-49.25	1	224	11344.1	22757.7	11413.6	0.879403	0.773349	16193.2	11474.9	-2.17829	0.272908		357.985	718.162	360.177
3206720	ORINOCO	PUENTEANGOSTURA	VE	836000	8.15	-63.6	838059	8.25	-63.75	1	132	32719.9	39788	7068.13	0.799411	0.639059	15907.4	11354.6	0.470017	0.727338		1032.54	1255.59	223.048
4103200	YUKONRIVER	PILOTSTATION_AK	US	831390	61.9337	-162.883	825250	62.75	-163.75	1	330	6583.84	1907.33	-4676.51	0.730848	0.534139	6487.87	4687.92	-0.480776	-3.07978		207.766	60.1894	-147.576
2181900	YANGTZERIVER_CHANGJIANG_	DATONG	CN	1705383	30.77	117.62	1709530	31.25	117.75	1	12	25012.3	25330.1	317.829	0.982746	0.965789	2231.45	1877.06	0.964606	0.954323		789.31	799.34	10.0297
2856900	GODAVARI	POLAVARAM	IN	299320	16.92	81.78	303518	17.75	81.25	1	12	2171.25	5481.37	3310.12	0.922726	0.851424	4652.08	3310.12	-1.10692	0.234299		68.518	172.975	104.457
4115200	COLUMBIARIVER	THEDALLES_OR	US	613830	45.6073	-121.173	617860	45.75	-121.25	1	384	4960.51	3383.84	-1576.67	0.63771	0.406674	2202.29	1715.41	-0.255793	0.342156		156.538	106.784	-49.7548
2335950	INDUS	KOTRI	PK	832418	25.37	68.37	835154	24.75	68.25	1	12	1666.42	2363.52	697.103	0.213783	0.0457033	2288.4	1946.75	-0.508932	0.144045		52.587	74.5854	21.9984
1537100	CHARI	NDJAMENA_FORTLAMY_	TD	600000	12.12	15.03	604180	11.75	15.25	1	115	480.583	4537.35	4056.77	0.4484	0.201063	5996.42	4062.31	-94.7224	-0.362986		15.1657	143.185	128.019
4152050	COLORADORIVER_PACIFICOCEAN_	BELOWYUMAMAINCANALWWATYUMA_AZ	US	618715	32.7317	-114.632	628266	32.75	-114.75	1	384	79.1641	901.949	822.784	0.29133	0.0848729	998.912	823.421	-68.1116	-0.402979		2.49818	28.4627	25.9645
6980802	DNEPR	KAKHOVSKOYEVODOKHRANILISHCHEGES	UA	482000	46.77	33.18	486298	47.25	34.25	1	120	1422.2	2487.48	1065.28	0.299195	0.0895175	1500.35	1233.87	-2.69889	0.153132		44.8804	78.4972	33.6169
2180800	HUANGHE_YELLOWRIVER_	HUAYUANKOU	CN	730036	34.92	113.65	730401	34.75	114.75	1	120	1282.05	2470.82	1188.77	0.807086	0.651388	2043.57	1311.01	-3.01961	0.229325		40.4576	77.9714	37.5138
1234150	NIGER	NIAMEY	NE	700000	13.52	2.08	701748	13.75	1.75	1	191	700.969	3579.64	2878.67	0.357382	0.127722	4355.58	2959.12	-50.401	-0.318074		22.1204	112.962	90.842
6977100	VOLGA	VOLGOGRADPOWERPLANT	RU	1360000	48.8047	44.5858	1360010	48.75	44.75	1	72	8145.28	8096.31	-48.968	0.735569	0.541061	3027.39	2399.17	0.487405	0.733296		257.04	255.495	-1.54528
4351900	RIOGRANDE_US_MXBORDER_	MATAMOROS	MX	450902	25.9	-97.52	473963	26.25	-98.75	1	264	16.4266	1005.74	989.309	0.2423	0.0587093	1300.61	989.309	-1507.04	-0.56991		0.518373	31.7379	31.2196
6742500	DANUBERIVER	ZIMNICEA	RO	658400	43.6272	25.3544	659379	43.75	25.75	1	288	5839.17	6789.22	950.051	0.461538	0.213017	2505.65	1983.1	-0.503706	0.42517		184.266	214.247	29.9807
2917110	AMUDARYA	KERKI	TM	309000	37.83	65.25	315618	37.75	65.25	1	120	1325.76	1930.1	604.342	0.528048	0.278834	1454.08	1008.89	-1.60045	0.294937		41.8369	60.908	19.0712
2646200	GANGES	HARDINGEBRIDGE	BD	846300	24.08	89.03	933349	24.75	88.25	1	83	11146.1	16347.5	5201.4	0.948845	0.900308	8869.07	5583.94	0.63182	0.594843		351.736	515.876	164.14
5204251	DARLINGRIVER	BURTUNDY	AU	647200	-33.7433	142.269	625770	-33.75	142.25	1	351	31.2841	3059.97	3028.69	0.13377	0.0178945	3960.18	3028.69	-5348.76	-0.639551		0.987231	96.5633	95.5761
2919200	URAL	KUSHUM	KZ	190000	50.85	51.28	190949	51.25	51.25	1	120	277.673	654.314	376.641	0.498684	0.248686	937.75	513.27	-5.06879	0.0212288		8.76251	20.6481	11.8856
2903420	LENA	KYUSYUR_KUSUR_	RU	2430000	70.7	127.65	2423610	70.25	126.75	1	264	17133.9	12048.7	-5085.2	0.810796	0.657391	16061.3	8630.48	0.423995	-0.620484		540.693	380.219	-160.473
2969101	MEKONG	KHONGCHIAM_BANDAN_	TH	419000	15.3183	105.5	421142	16.25	105.25	1	168	9276.09	7352.85	-1923.24	0.931005	0.86677	4123.67	2682.5	0.763671	0.499438		292.725	232.033	-60.6916
2906900	AMUR	KOMSOMOLSK	RU	1730000	50.63	137.12	1730150	50.25	136.75	1	226	9831.87	9922.33	90.4679	0.742276	0.550973	5803.27	4035.04	0.469722	0.740769		310.263	313.118	2.85489
1357100	OKAVANGO_CUBANGO	MOHEMBO_MTAEMBO__________	BW	410000	-18.2833	21.8	251789	-19.25	22.75	1	254	247.762	416.958	169.196	0.621578	0.386359	502.782	271.206	-12.9869	0.0643307		7.8186	13.1579	5.33931
4213712	NELSONRIVER	KETTLEGENERATINGSTATION	CA	1060000	56.3803	-94.6339	1058040	56.75	-93.75	1	288	3320.07	5616.01	2295.95	0.366908	0.134622	3594.22	2893.89	-13.1817	-0.0140851		104.771	177.224	72.453
4127800	MISSISSIPPIRIVER	VICKSBURG_MS	US	2964255	32.315	-90.9058	2964670	31.75	-91.25	1	54	18939.7	27589.4	8649.72	0.618262	0.382248	12290.5	10050.5	-0.487745	0.505722		597.678	870.637	272.958
2854300	KRISHNA	VIJAYAWADA	IN	251355	16.52	80.62	255506	16.75	80.25	1	12	833.333	2445.09	1611.75	0.774911	0.600487	2333.12	1613.23	-3.12234	0.128489		26.2974	77.1594	50.8619
1891500	ZAMBEZI	MATUNDO_CAIS__________	MZ	940000	-16.15	33.5917	1076200	-15.75	32.75	1	136	2188.39	6445.3	4256.91	0.402129	0.161708	6035.98	4591.88	-24.9805	-0.160336		69.059	203.394	134.335
1159100	ORANGE	VIOOLSDRIF__________	ZA	866486	-28.7578	17.7214	870174	-28.75	17.75	1	384	167.685	892.273	724.588	0.592202	0.350703	954.518	728.975	-6.78822	-0.0619999		5.29162	28.1574	22.8658
5404270	MURRAY	OVERLANDCORNER______KM_	AU	1000001	-34.1708	140.275	1001840	-34.25	140.75	1	306	163.741	4894.5	4730.76	0.173727	0.0301809	5857.26	4730.76	-786.314	-0.581357		5.16716	154.455	149.288
1531700	VOLTA	SENCHI_HALCROW_	GH	394100	6.2	0.1	401991	6.25	0.25	1	72	833.125	2621.02	1787.89	0.200116	0.0400464	2417.54	1814.89	-58.6746	-0.328062		26.2909	82.7112	56.4203
3618000	AMAZONAS	JATUARANA	BR	2854286	-3.0633	-59.6478	2946190	-3.25	-59.75	1	375	125168	127833	2665.29	0.595165	0.354221	37991.7	30882.9	-0.321042	0.500259		3949.92	4034.03	84.1083
2911097	IRTYSH	TOBOLSK	RU	969000	58.2	68.23	1009560	58.25	68.25	1	226	2144.2	3102.54	958.347	0.568785	0.323516	2288.93	1459.05	-0.779935	0.383431		67.6642	97.9067	30.2425
2916200	SYRDARYA	TYUMEN_ARYK	KZ	219000	44.05	67.05	215892	43.75	67.25	1	96	231.533	747.893	516.36	0.801606	0.642572	733.846	519.012	-14.9417	-0.01727		7.30646	23.6012	16.2947
1147010	CONGO	KINSHASA	CD	3475000	-4.3	15.3	3614930	-3.25	16.25	1	384	38798.3	65286.4	26488.1	0.451388	0.203751	30665.8	26615.9	-9.62617	0.180598		1224.36	2060.24	835.882
1896501	LIMPOPO	SICACATE__________	MZ	416522	-24.7444	33.5431	418117	-24.75	33.25	1	84	106.462	801.029	694.567	0.818253	0.669539	1054.84	694.567	-22.9031	-0.17735		3.35962	25.278	21.9184
2912600	OB	SALEKHARD	RU	2949998	66.57	66.53	2471340	66.75	67.75	1	372	13054.6	12282.9	-771.706	0.656871	0.431479	8356.73	5196.48	0.384848	0.615226		411.964	387.611	-24.3527
3651805	SAOFRANCISCO	MANGA	BR	202000	-14.7572	-43.9322	203432	-15.75	-44.25	1	375	2098.2	3643.86	1545.66	0.818757	0.670364	2903.85	1587.22	-2.40126	0.274792		66.2127	114.989	48.7764
2909150	YENISEY	IGARKA	RU	2440000	67.48	86.5	2440630	66.25	87.25	1	252	18815.8	12533.6	-6282.2	0.722628	0.522192	16860.5	7597.76	0.27436	-1.0314		593.767	395.52	-198.247
4213551	SASKATCHEWANRIVER	GRANDRAPIDS	CA	364000	53.1639	-99.3489	359908	53.25	-100.25	1	384	534.293	1552.94	1018.64	-0.054434	0.00296306	1625.6	1199.04	-30.0179	-0.456002		16.8606	49.0059	32.1452
2998510	KOLYMA	KOLYMSKAYA	RU	526000	68.73	158.72	540757	68.75	158.75	1	324	3257.27	2666.01	-591.266	0.873624	0.76322	3118.06	1936.59	0.519391	-0.536102		102.79	84.131	-18.6585
																								2298.89
																						13146.9	15445.8	2298.89
