# Supplementary material for: Hydrological impacts of global land cover change and human water use
Source: Copernicus journal article supplement (doi:10.5194/hess-21-5603-2017), 2017-11-14
Supplement: Supplementary file 1 [file hess-21-5603-2017-supplement.zip]

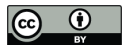

## *Supplement of*

# **Hydrological impacts of global land cover change and human water use**

**Joyce H. C. Bosmans et al.**

*Correspondence to:* Joyce H. C. Bosmans ([j.h.c.bosmans@uu.nl](mailto:j.h.c.bosmans@uu.nl))

- [hess-21-5603-2017-supplement-title-page.pdf](#)
- Supplementary
  - [Comparison\\_GRDC.xlsx](#)
  - [area\\_table\\_pasture.tbl](#)

The copyright of individual parts of the supplement might differ from the CC BY 3.0 License.
